# Supplementary material for: Novel butane sulfonic acid-functionalized core–shell magnetic nanocatalysts for ultrasound-assisted coumarin synthesis
Source: Royal Society of Chemistry journal article supplement (doi:10.1039/d3nj04912d), 2023-12-27
Supplement: d3nj04912d1.pdf [file d3nj04912d1.pdf]

## Supporting Information

### Novel butane sulfonic acid-functionalized core-shell magnetic nanocatalysts for ultrasound-assisted coumarin synthesis

Somayeh Soleimani-Amri<sup>1\*</sup>, Yasaman Salemi<sup>1</sup>

<sup>1</sup>Department of Chemistry, Karaj Branch, Islamic Azad University, Karaj, Iran

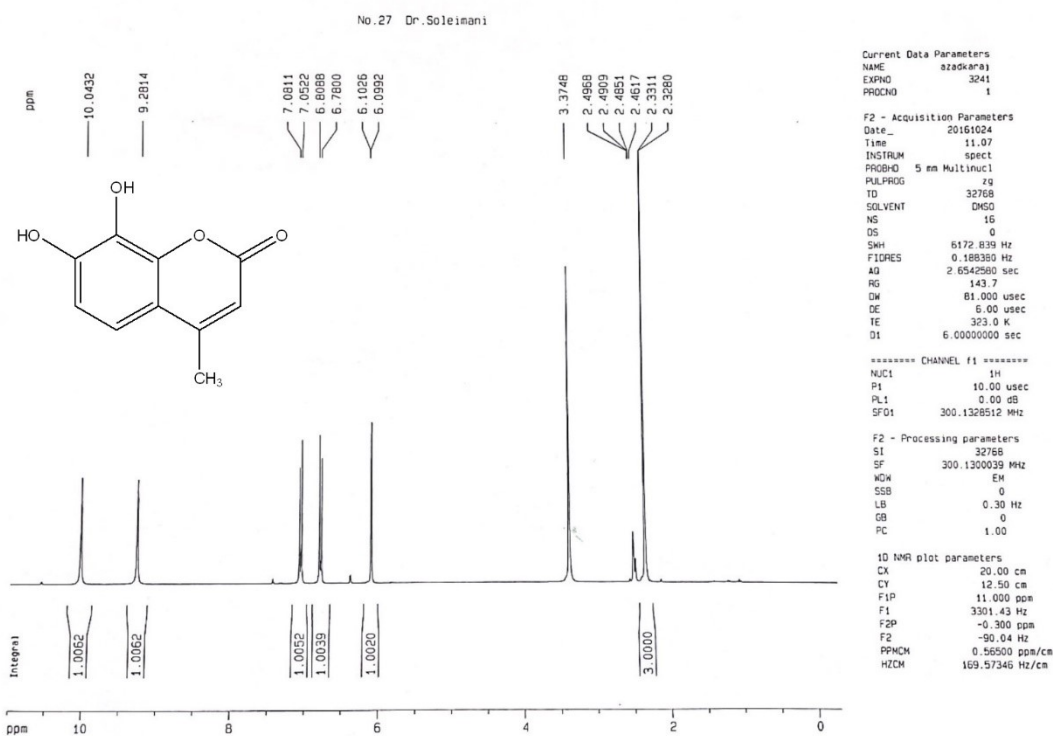

<sup>1</sup>H NMR of 7,8-Dihydroxy-4-methylcoumarin (**3b**)

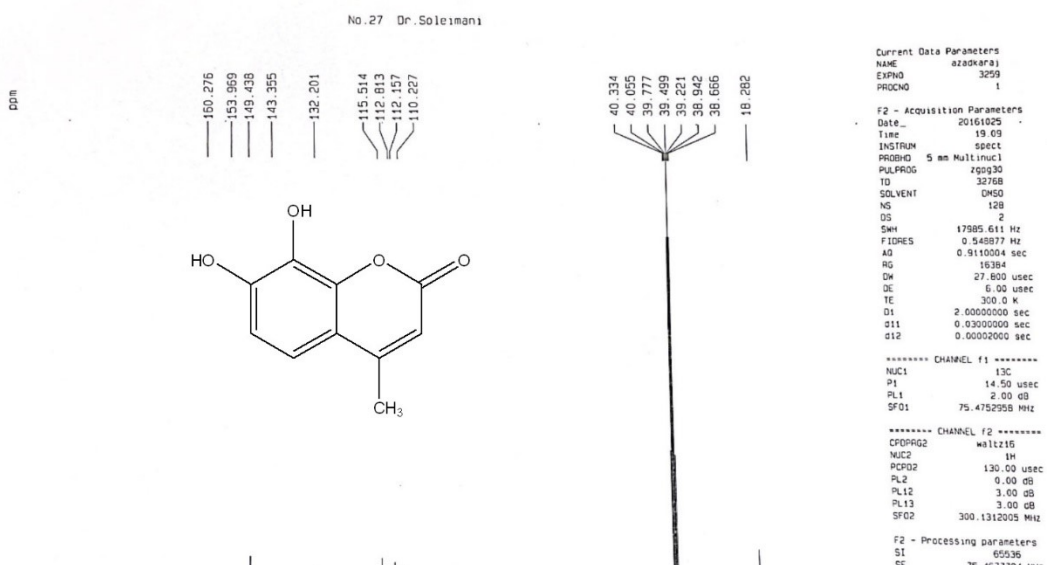

<sup>13</sup>C NMR of 8-Hydroxy-4-methylcoumarin (**3b**)

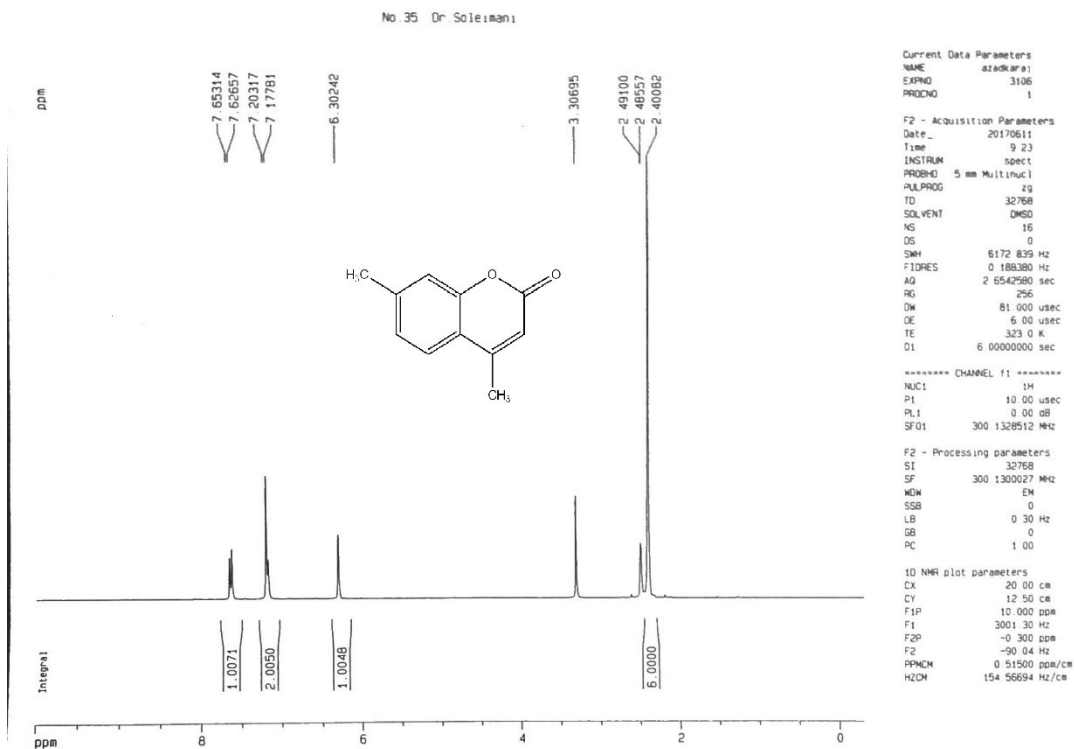

<sup>1</sup>H NMR of 4,7-dimethylcoumarin (**3g**)

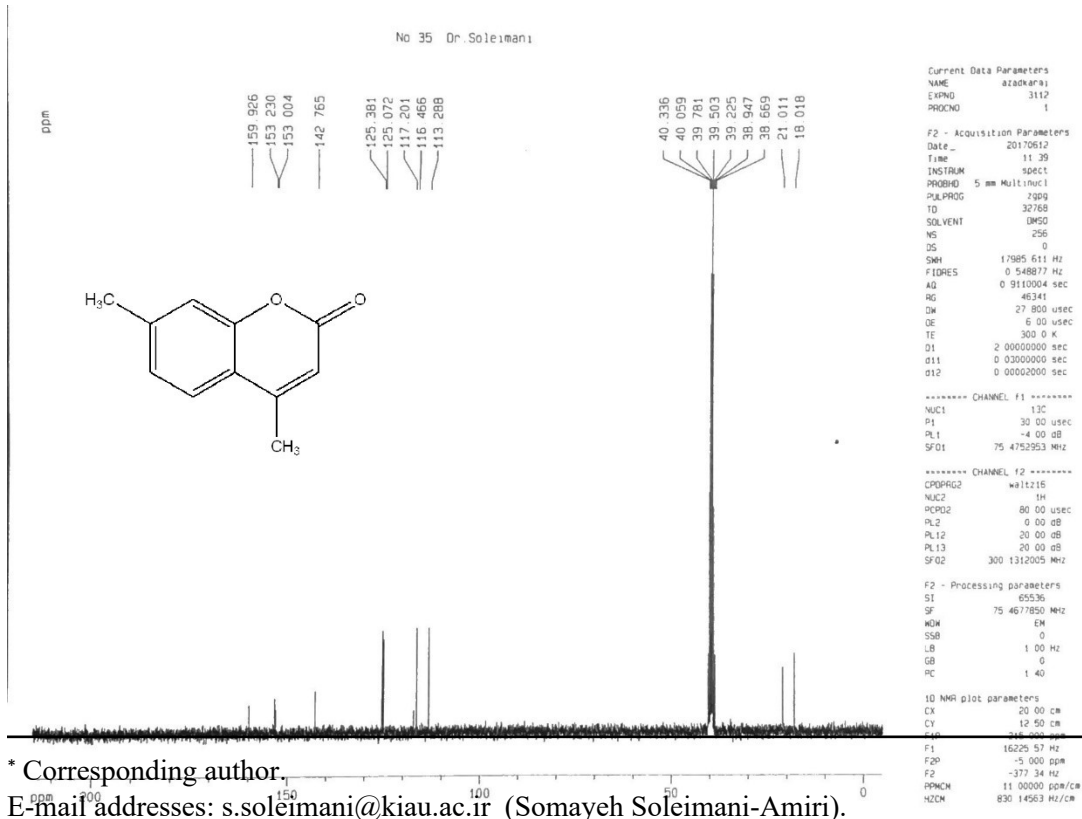

<sup>13</sup>C NMR of 4,7-dimethylcoumarin (**3g**)

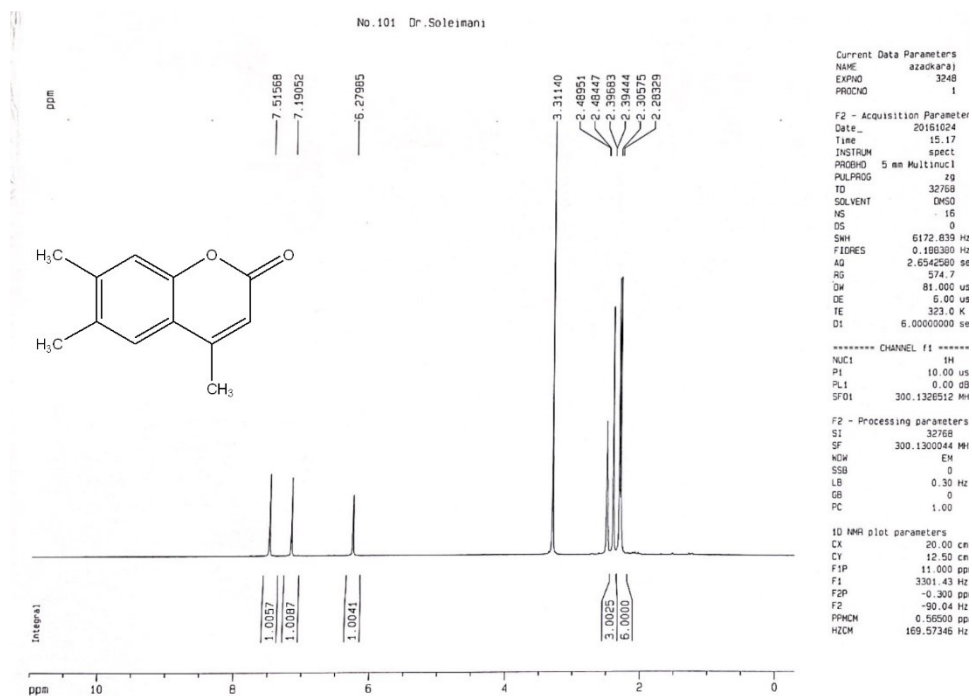

<sup>1</sup>H NMR of 4,6,7-trimethylcoumarin (**3h**)

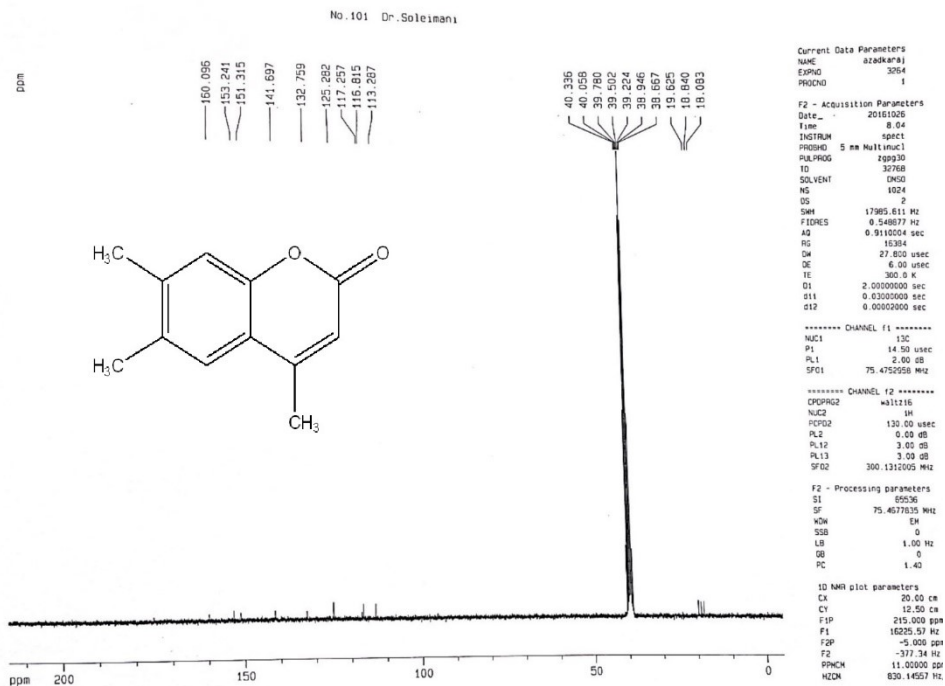

<sup>13</sup>C NMR of 4,6,7-trimethylcoumarin (**3h**)

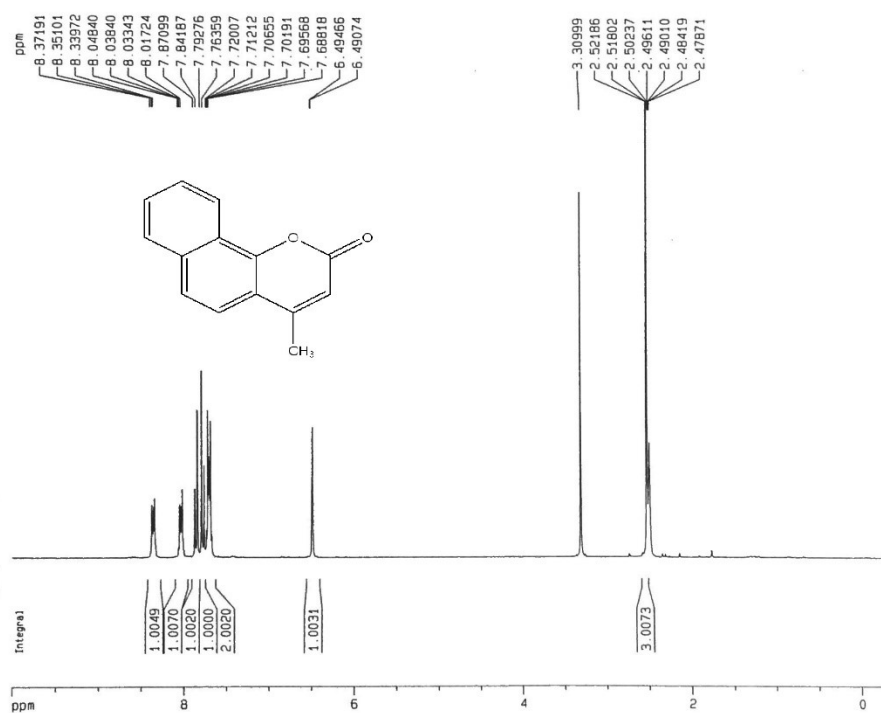

Current Data Parameters  
 NAME azadkara1  
 EXPNO 3107  
 PROCNO 1

F2 - Acquisition Parameters  
 Date\_ 20170611  
 Time 9.31  
 INSTRUM spect  
 PROBHD 5 mm Multinucl  
 PULPROG zg  
 TD 32768  
 SOLVENT DMSO  
 NS 16  
 DS 0  
 SWH 6172.839 Hz  
 FIDRES 0.188380 Hz  
 AQ 2.6542580 sec  
 RG 322.5  
 DW 81.000 usec  
 DE 6.00 usec  
 TE 323.0 K  
 D1 6.0000000 sec

\*\*\*\*\* CHANNEL f1 \*\*\*\*\*  
 NUC1 1H  
 P1 10.00 usec  
 PL1 0.00 dB  
 SF01 300.1328512 MHz

F2 - Processing parameters  
 SI 32768  
 SF 300.1300029 MHz  
 WDM EM  
 SSB 0  
 LB 0.30 Hz  
 GB 0  
 PC 1.00

1D NMR plot parameters  
 CX 20.00 cm  
 CY 12.50 cm  
 F1P 10.000 ppm  
 F1 3001.30 Hz  
 F2P -0.300 ppm  
 F2 -90.04 Hz  
 PPMCM 0.51500 ppm/cm  
 HZCM 154.56694 Hz/cm

<sup>1</sup>H NMR of 4-methyl-2H-benzo[h]coumarin (3i)

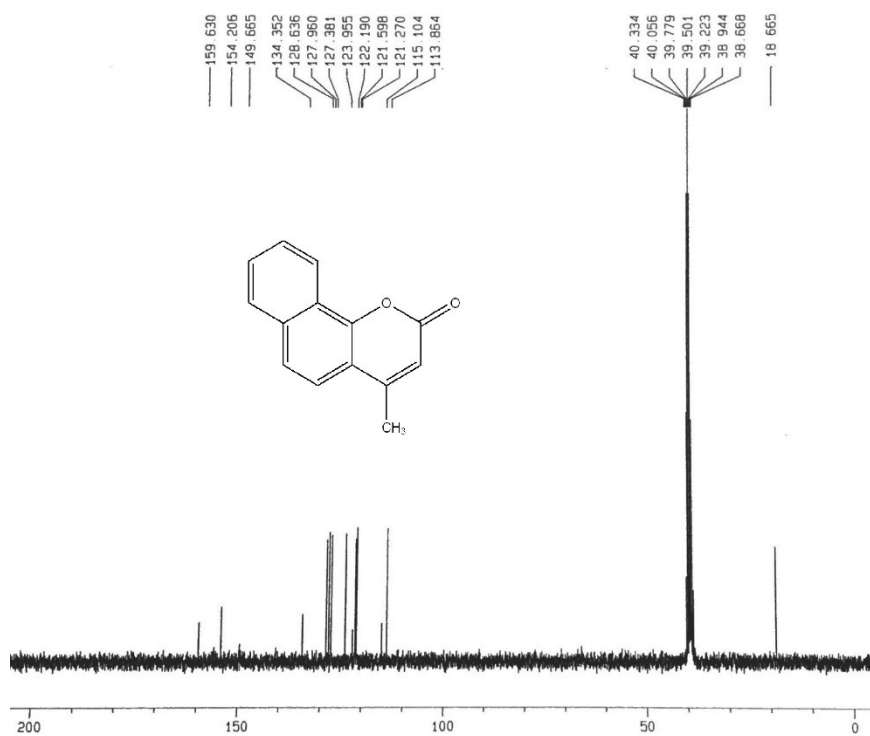

Current Data Parameters  
 NAME azadkara1  
 EXPNO 3113  
 PROCNO 1

F2 - Acquisition Parameters  
 Date\_ 20170612  
 Time 11.56  
 INSTRUM spect  
 PROBHD 5 mm Multinucl  
 PULPROG zgpg  
 TD 32768  
 SOLVENT DMSO  
 NS 425  
 DS 0  
 SWH 17985.511 Hz  
 FIDRES 0.548877 Hz  
 AQ 0.9110004 sec  
 RG 46341  
 DW 27.800 usec  
 DE 6.00 usec  
 TE 300.0 K  
 D1 2.0000000 sec  
 d11 0.0300000 sec  
 d12 0.0000200 sec

\*\*\*\*\* CHANNEL f1 \*\*\*\*\*  
 NUC1 13C  
 P1 30.00 usec  
 PL1 -4.00 dB  
 SF01 75.4752953 MHz

\*\*\*\*\* CHANNEL f2 \*\*\*\*\*  
 CPDPRG2 waltz16  
 NUC2 1H  
 PCPD2 80.00 usec  
 PL2 0.00 dB  
 PL12 20.00 dB  
 PL13 20.00 dB  
 SF02 300.1312005 MHz

F2 - Processing parameters  
 SI 65336  
 SF 75.4677853 MHz  
 WDM EM  
 SSB 0  
 LB 1.00 Hz  
 GB 0  
 PC 1.40

1D NMR plot parameters  
 CX 20.00 cm  
 CY 12.50 cm  
 F1P 215.000 ppm  
 F1 16225.57 Hz  
 F2P -5.000 ppm  
 F2 -377.34 Hz  
 PPMCM 11.00000 ppm/cm  
 HZCM 830.14563 Hz/cm

<sup>13</sup>C NMR of 4-methyl-2H-benzo[h]coumarin (3i)

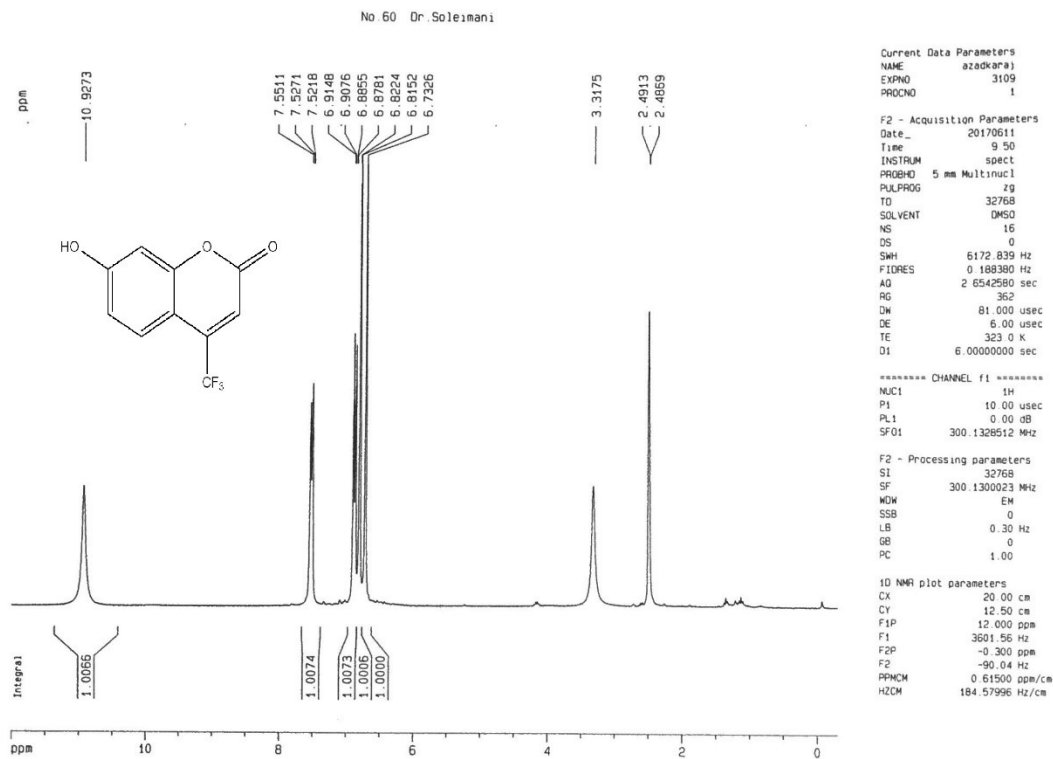

<sup>1</sup>H NMR of 7-hydroxy-4-(trifluoromethyl)coumarin (3j)

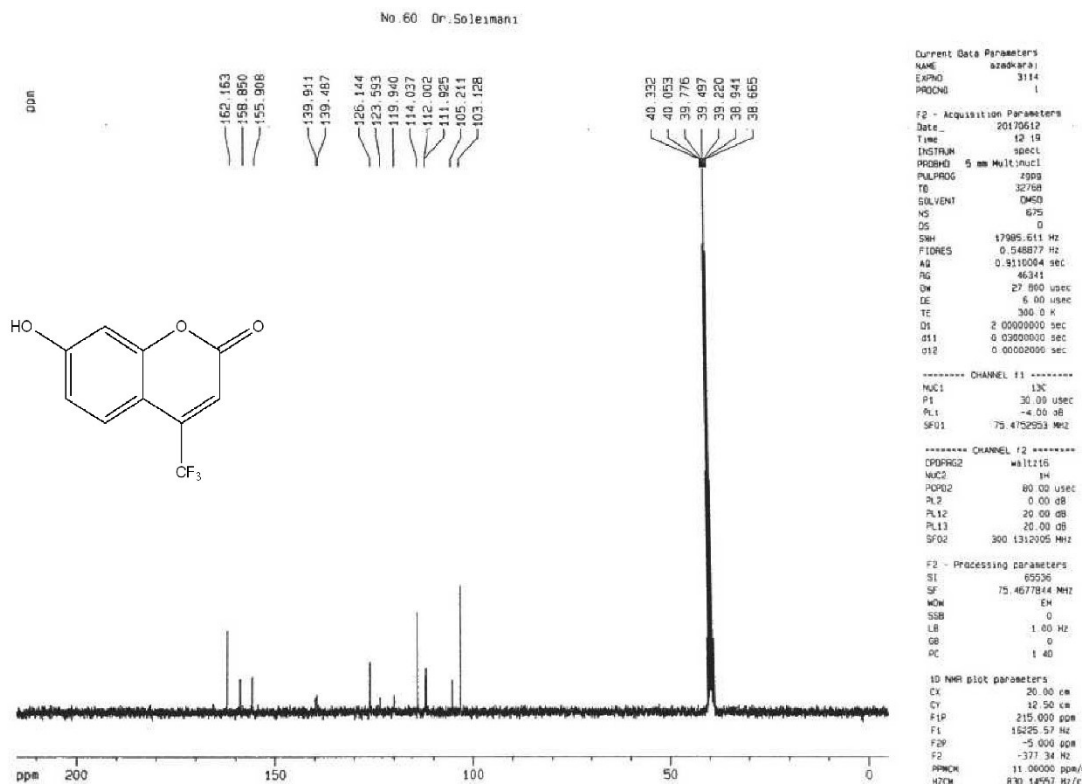

<sup>13</sup>C NMR of 7-hydroxy-4-(trifluoromethyl)coumarin (**3j**)

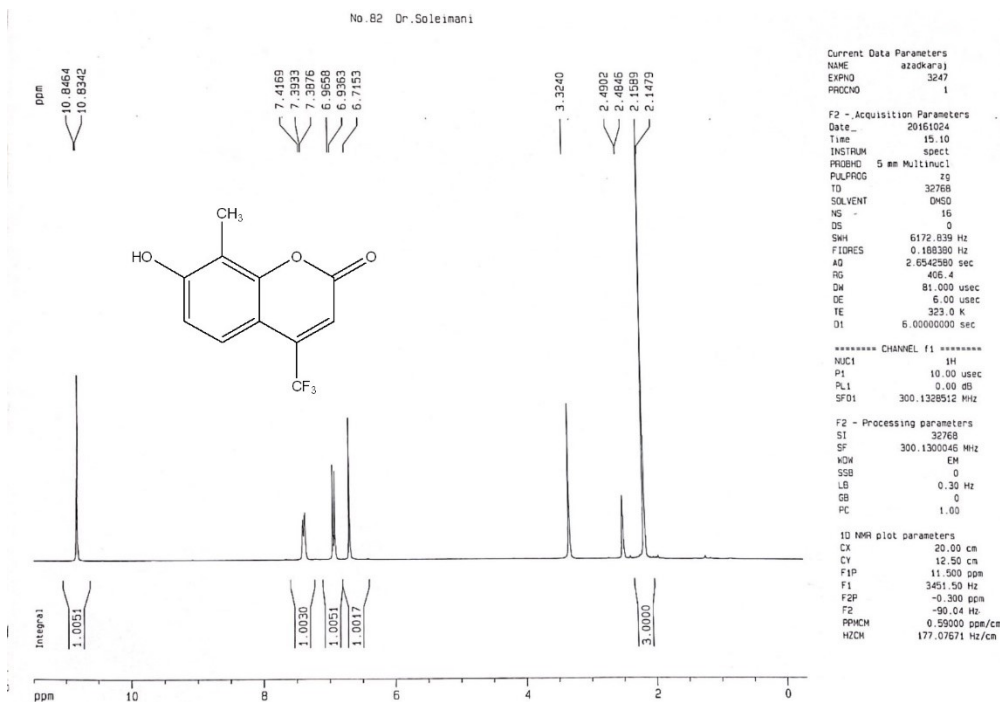

<sup>1</sup>H NMR of 7-hydroxy-8-methyl-4-(trifluoromethyl)coumarin (**3m**)

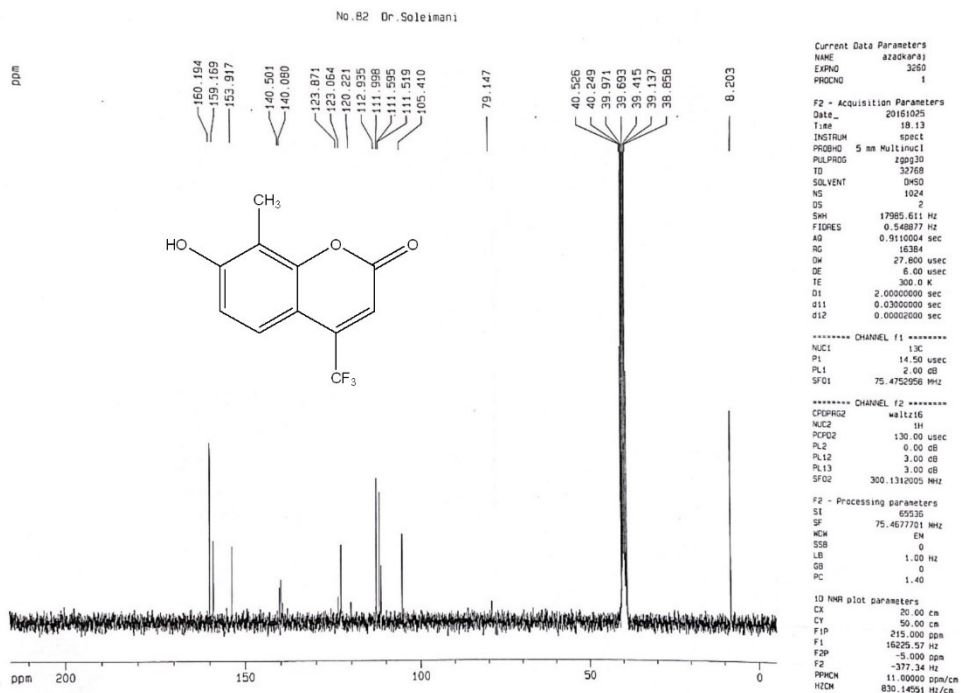

<sup>13</sup>C NMR of 7-hydroxy-8-methyl-4-(trifluoromethyl)coumarin (**3m**)

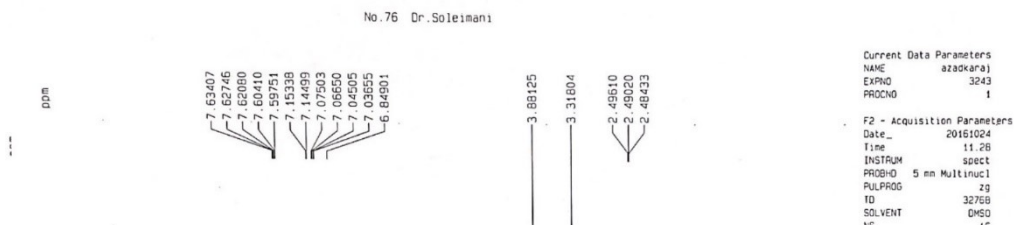

<sup>1</sup>H NMR of 7-methoxy-4-(trifluoromethyl)coumarin (**3n**)

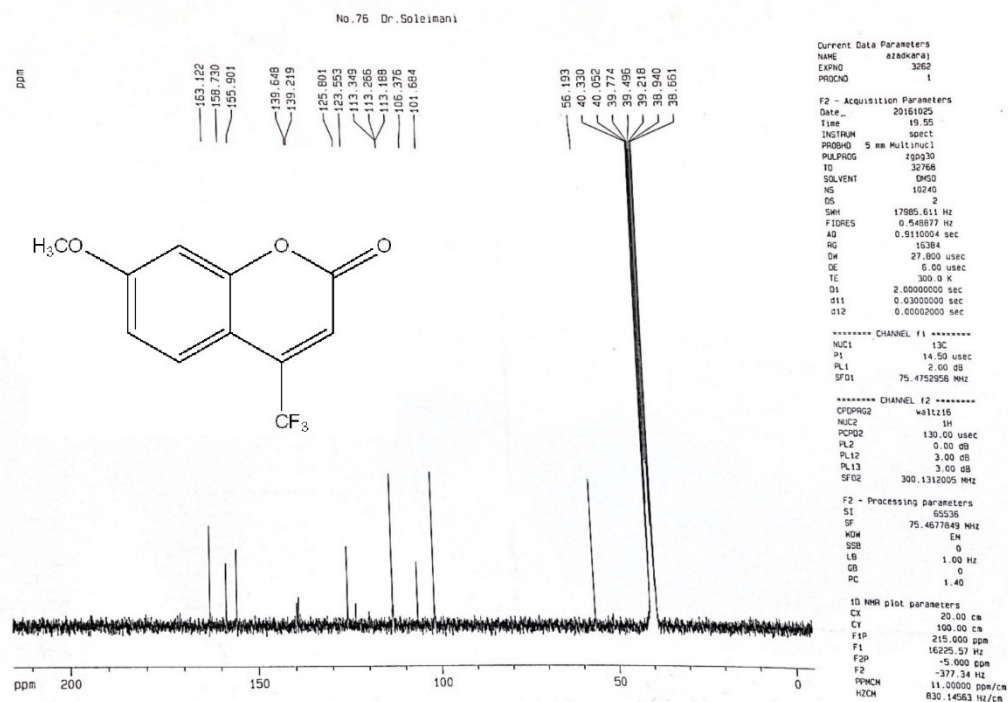

<sup>13</sup>C NMR of 7-methoxy-4-(trifluoromethyl)coumarin (**3n**)

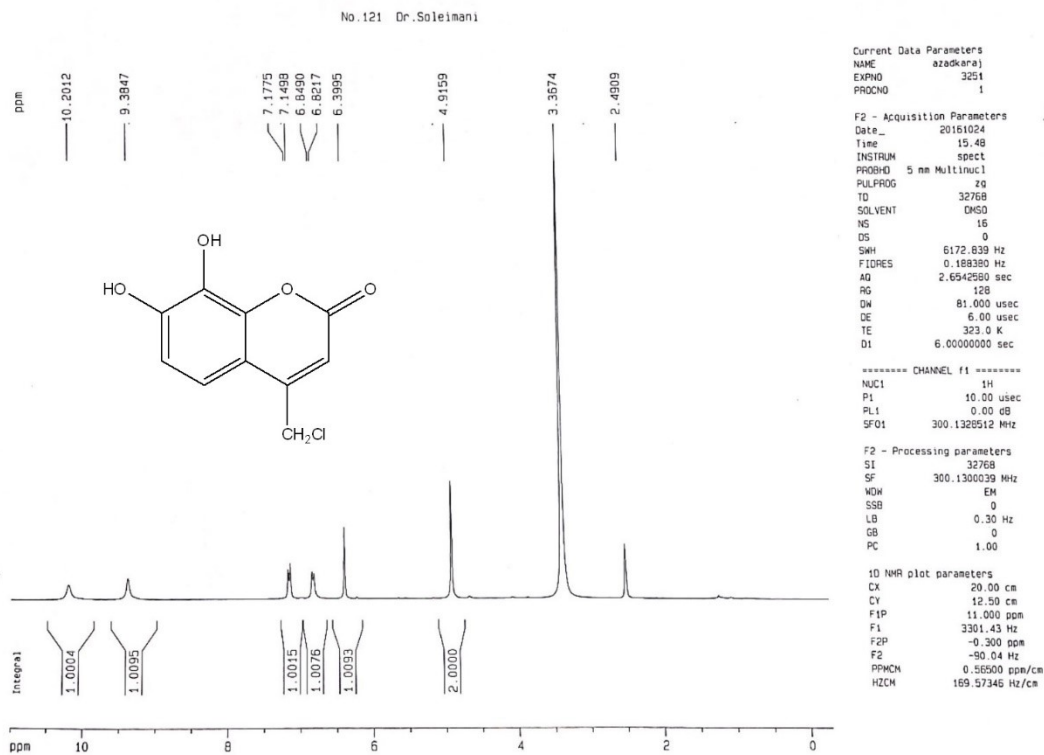

<sup>1</sup>H NMR of 4-(chloromethyl)-7,8-dihydroxycoumarin (**3q**)

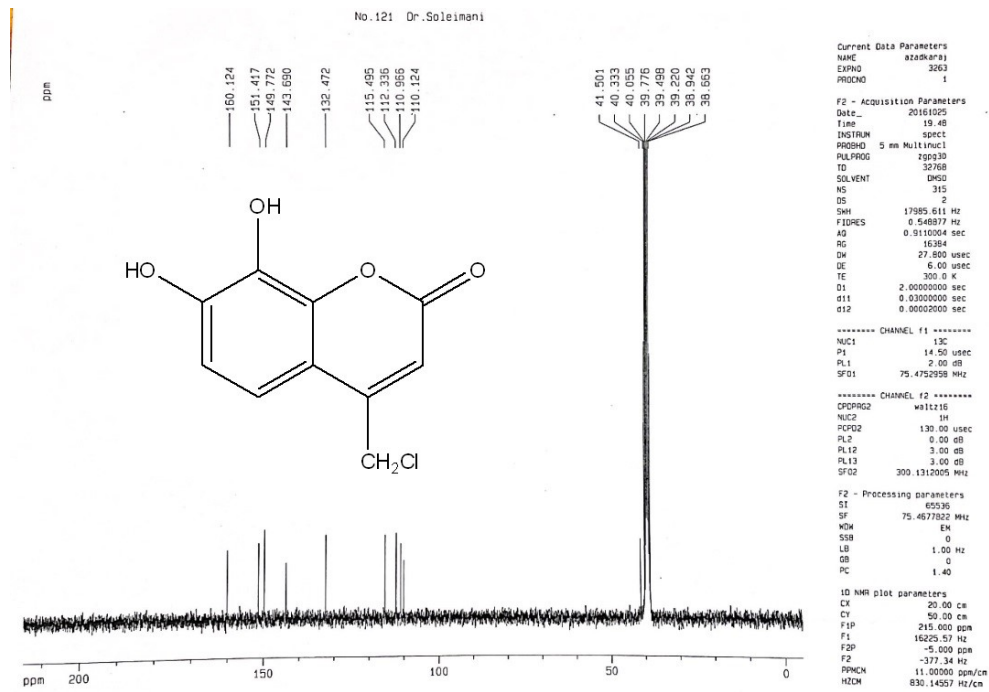

<sup>13</sup>C NMR of 4-(chloromethyl)-7,8-dihydroxycoumarin (3q)

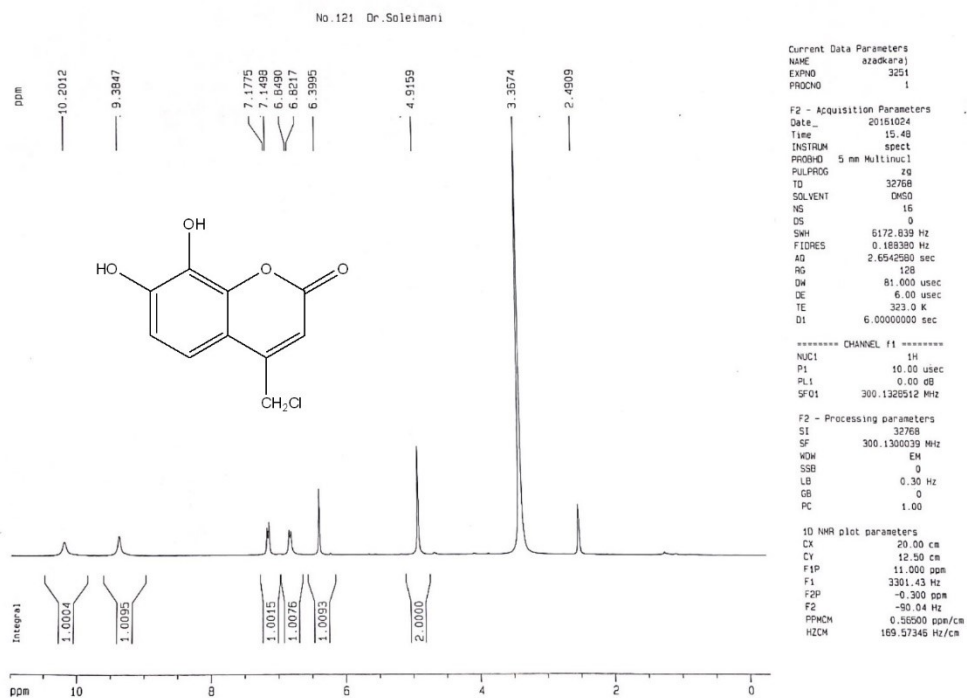

<sup>1</sup>H NMR of 4-(chloromethyl)-5,7-dihydroxycoumarin (3r)

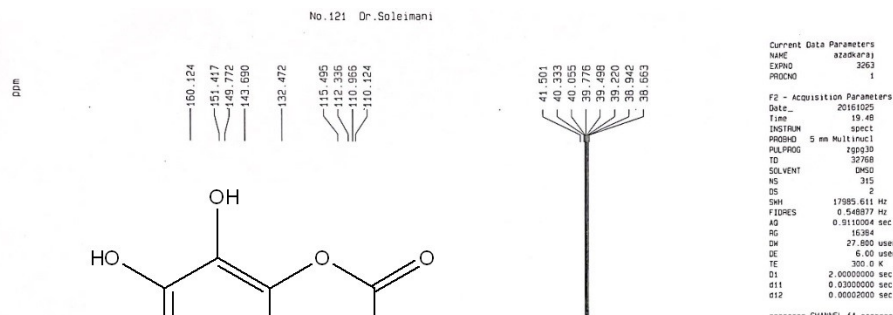



$^{13}\text{C}$  NMR of 4-(chloromethyl)-5,7-dihydroxycoumarin (**3r**)

**Figure S1.**  $^1\text{H}$  and  $^{13}\text{C}$  NMR spectra of some synthesized coumarins.
